# Supplementary material for: Systematic Review of Myopia Progression after Cessation of Optical Interventions for Myopia Control
Source: MDPI journal article supplement (doi:10.3390/jcm13010053), 2023-12-21
Supplement: s1 [file s1]

## *Supplementary Material*

# **Systematic Review of Myopia Progression after Cessation of Optical Interventions for Myopia Control**

**Yu-Chieh Chiu <sup>1,†</sup>, Ping-Chiao Tsai <sup>1,†</sup>, Ssu-Hsien Lee <sup>1,†</sup>, Jen-Hung Wang <sup>2</sup> and  
Cheng-Jen Chiu <sup>3,4,\*</sup>**

1 School of Medicine, Tzu Chi University, Hualien 970, Taiwan;  
hl2200571@tzuchi.com.tw (Y.-C.C.); hl2200544@tzuchi.com.tw (P.-C.T.);  
hl2200543@tzuchi.com.tw (S.-H.L.)

2 Department of Medical Research, Buddhist Tzu Chi General Hospital, Hualien  
970, Taiwan;

paulwang@tzuchi.com.tw

3 Department of Ophthalmology and Visual Science, Tzu Chi University, Hualien  
970, Taiwan

4 Department of Ophthalmology, Hualien Tzu Chi Hospital, the Buddhist Tzu Chi  
Medical Foundation, Hualien 970, Taiwan

\* Correspondence: drcjchiu@tzuchi.com.tw

† These authors contributed equally to this work.

**Table S1.** Keywords and search results in different databases

| Database           | Keyword                                                                                                                                                                                                                        | Filter                                 | Date             | Results |
|--------------------|--------------------------------------------------------------------------------------------------------------------------------------------------------------------------------------------------------------------------------|----------------------------------------|------------------|---------|
| PubMed             | (myopia OR nearsightedness) AND (discontinue OR cease OR cessation OR stop OR stopped OR rebound OR swap OR swapped OR switch OR crossover)                                                                                    | NA                                     | October 29, 2023 | 634     |
| Embase             | ((myopia.mp. OR exp myopia/) OR nearsightedness.mp.) AND (discontinue.mp. OR cease.mp. OR cessation.mp. OR stop.mp. OR stopped.mp. OR (rebound.mp. OR exp rebound/) OR swap.mp. OR swapped.mp. OR switch.mp. OR crossover.mp.) | NA                                     | October 29, 2023 | 582     |
| Cochrane CENTRAL   | ((myopia OR [myopia]) OR nearsightedness) AND (discontinue OR cease OR cessation OR stop OR stopped OR rebound OR swap OR swapped OR switch OR crossover)                                                                      | NA                                     | October 29, 2023 | 294     |
| ClinicalTrials.gov | (myopia OR nearsightedness) AND (discontinue OR cease OR cessation OR stop OR stopped OR rebound OR swap OR swapped OR switch OR crossover)                                                                                    | Other Terms<br>Condition or<br>disease | October 29, 2023 | 255     |

NA: not applied

**Table S2.** Excluded studies and reasons

| Study                                                                                                                                                    | Reason for exclusion            |
|----------------------------------------------------------------------------------------------------------------------------------------------------------|---------------------------------|
| Short-term changes in ocular biometry and refraction after discontinuation of long-term orthokeratology (1)                                              | Insufficient cessation duration |
| Weekly Changes in Axial Length and Choroidal Thickness in Children During and Following Orthokeratology Treatment With Different Compression Factors (2) | Insufficient treatment duration |
| The Berkeley Orthokeratology Study, Part II: Efficacy and duration (3)                                                                                   | Insufficient data               |
| Orthokeratology reshapes eyes to be less prolate and more symmetric (4)                                                                                  | Insufficient data               |
| Corneal change accompanying orthokeratology. Plastic or elastic? Results of a randomized controlled clinical trial (5)                                   | Insufficient data               |
| Residual corneal flattening after discontinuation of long-term orthokeratology lens wear in asian children (6)                                           | Insufficient data               |
| Observation of orthokeratology discontinuation (7)                                                                                                       | No full text available          |
| Changes in corneal densitometry after long-term orthokeratology for myopia and short-term discontinuation (8)                                            | Insufficient data               |
| Effect of overnight orthokeratology lenses on tear film stability in children (9)                                                                        | Insufficient data               |

|                                                                                                                                                    |                   |
|----------------------------------------------------------------------------------------------------------------------------------------------------|-------------------|
| Long-term changes in corneal morphology induced by overnight orthokeratology (10)                                                                  | Insufficient data |
| Comparison of myopia progression between children wearing three types of orthokeratology lenses and children wearing single-vision spectacles (11) | Insufficient data |
| Changes in corneal subbasal nerve morphology and sensitivity during orthokeratology: Recovery of change (12)                                       | Insufficient data |
| Increased Corneal Toricity after Long-Term Orthokeratology Lens Wear (13)                                                                          | Insufficient data |
| Refractive and corneal responses of young myopic children to short-term orthokeratology treatment with different compression factors (14)          | Insufficient data |
| Corneal thickness changes in myopic children during and after short-term orthokeratology lens wear (15)                                            | Insufficient data |
| Discontinuation of long term orthokeratology lens wear and subsequent refractive surgery outcome (16)                                              | Insufficient data |
| Efficacy, predictability and safety of long-term orthokeratology: An 18-year follow-up study (17)                                                  | Insufficient data |
| Retardation of myopia in Orthokeratology (ROMIO) study: a 2-year randomized clinical trial (18)                                                    | Insufficient data |
| Overnight orthokeratology: refractive and corneal recovery after discontinuation of reverse-geometry lenses (19)                                   | Insufficient data |
| Reversibility of effects of orthokeratology on visual acuity, refractive error, corneal topography, and contrast sensitivity (20)                  | Insufficient data |

|                                                                                                                                                              |                   |
|--------------------------------------------------------------------------------------------------------------------------------------------------------------|-------------------|
| Recovery of corneal irregular astigmatism, ocular higher-order aberrations, and contrast sensitivity after discontinuation of overnight orthokeratology (21) | Insufficient data |
| Influence of the duration of orthokeratology lens cessation on patients' refractive status and corneal endothelial cells (22)                                | Insufficient data |
| The comparative study of orthokeratology lens and frame glasses in adolescent myopia (23)                                                                    | Insufficient data |
| Effects of Orthokeratology Lens on Corneal Endothelium and Corneal Thickness (24)                                                                            | Insufficient data |
| Study on the Changes of Refraction and Corneal Shape after Stop Wearing Orthokeratology (25)                                                                 | Insufficient data |
| Clinical effect of orthokeratology for juvenile with myopia astigmatism and its effects on corneal endothelial cells (26)                                    | Insufficient data |
| Observation of orthokeratology discontinuation (27)                                                                                                          | Insufficient data |
| Changes and Relationship Analysis of Ocular Parameters After Short-term Discontinuation of Orthokeratology (28)                                              | Insufficient data |
| Analysis of corneal morphology after one-month discontinuation of orthokeratology treatment (29)                                                             | Insufficient data |
| Specular microscopy studies on the corneal endothelium after cessation of contact lens wear (30)                                                             | Insufficient data |
| Effects of long-term soft contact lens wear on the corneal thickness and corneal epithelial thickness of myopic subjects (31)                                | Insufficient data |

|                                                                                                   |                                                |
|---------------------------------------------------------------------------------------------------|------------------------------------------------|
| Contact lenses to slow progression of myopia (32)                                                 | Insufficient data                              |
| Retardation of Myopia Progression by Multifocal Soft Contact Lenses (33)                          | Insufficient data                              |
| Challenges to the new soft contact lens wearer and strategies for clinical management (34)        | Insufficient data                              |
| MiSight Assessment Study Spain: Adverse Events, Tear Film Osmolarity, and Discontinuations (35)   | Overlapping participants,<br>insufficient data |
| Study of Theories about Myopia Progression (STAMP) design and baseline data, discontinuation (36) | Overlapping participants                       |

**Table S3A.** Characteristic of included studies of orthokeratology

| First Author               | Year | Study Design | (Group), N     | Age          | Baseline AL (mm)             | Baseline SE (D)                                | Male: Female | Treatment duration | Cessation duration | Country    | CO I |
|----------------------------|------|--------------|----------------|--------------|------------------------------|------------------------------------------------|--------------|--------------------|--------------------|------------|------|
| Swarbrick HA (37)          | 2014 | RCT          | 13             | 13.4 ± 1.9   | NA                           | -2.43 ± 0.98                                   | 14:12        | 1y                 | 2w                 | East Asian | Y    |
| Cho P (38)                 | 2016 | Non-RCT      | 15             | 10.0 (10–14) | 24.61 ± 0.90<br>24.07 ± 0.79 | -2.36 ± 1.06                                   | NA           | 2y                 | 14m                | Hong Kong  | Y    |
| Santodomingo-Rubido J (39) | 2016 | Non-RCT      | 8              | 10.4 ± 0.5   | 24.66 ± 0.30                 | Sphere: -2.31 ± 0.38<br>Cylinder: -0.38 ± 0.08 | 4:4          | 2y                 | 5y                 | Spain      | Y    |
| Wei S (40)                 | 2017 | RCT          | 45             | 11.0 ± 1.9   | 25.0 ± 0.8                   | -3.42 ± 1.36                                   | 17:28        | 1y                 | 1m                 | China      | Y    |
| Li H (41)                  | 2019 | Non-RCT      | Low SE: 59     | 8-16         | 25.06 ± 0.62                 | A ≤ -4                                         | 28:31        | 1y                 | 3m                 | China      | N    |
|                            |      |              | High SE: 56    |              | 25.62 ± 0.71                 | B -4 ~ -6                                      | 27:29        |                    |                    |            |      |
| Li Z (42)                  | 2019 | Non-RCT      | 29             | 12.31 ± 1.71 | 25.18 ± 0.77                 | -3.16 ± 0.85                                   | 13:16        | 1y                 | 1m                 | China      | N    |
| Wang A (43)                | 2022 | Non-RCT      | ALS Group: 54  | 9.63 ± 1.34  | 24.68 ± 0.9                  | -2.98 1.25                                     | 22:32        | 19m                | 1m                 | China      | Y    |
|                            |      |              | NALS Group: 52 | 9.12 ± 1.41  | 24.50 ± 0.68                 | -2.6 1.02                                      | 19:33        |                    |                    |            |      |

|            |      |     |     |                 |                  |                  |       |     |    |       |   |
|------------|------|-----|-----|-----------------|------------------|------------------|-------|-----|----|-------|---|
| Zhu Q (44) | 2023 | RCT | 142 | $9.18 \pm 1.29$ | $23.53 \pm 0.19$ | $-2.74 \pm 0.39$ | 70:72 | 13m | 1m | China | Y |
|------------|------|-----|-----|-----------------|------------------|------------------|-------|-----|----|-------|---|

All data shown in mean $\pm$ SD, if not marked otherwise

N: number of participants; COI: report conflict of interest; RCT: randomized controlled trial; m: month; y: year; NA: not mentioned

ALS: axial length shortening

NALS: no axial length shortening



**Table S3B.** Characteristic of included studies of multifocal soft contact lenses

| First author     | Year | Study Design | N              | Age         | Baseline AL (mm) | Baseline SE (D) | Male: Female | Treatment Duration | Cessation Duration | Country     | COI |
|------------------|------|--------------|----------------|-------------|------------------|-----------------|--------------|--------------------|--------------------|-------------|-----|
| Weng (45)        | 2022 | RCT          | MiSight: 34    | 10.8 ± 1.6  | 24.5 ± 0.8       | -1.91 ± 0.72    | 16:18        | 6m                 | 6m                 | China       | Y   |
| Ruiz-Pomeda (46) | 2021 | RCT          | MiSight: 18    | 13.2 ± 1.28 | 24.07 ± 0.52     | -2.13 ± 0.84    | NA           | 2y                 | 1y                 | Spain       | Y   |
| Cheng (47)       | 2016 | RCT          | With +SA: 53   | 9.7 ± 1.05  | 24.73 ± 0.71     | -2.52 ± 1.10    | 24:29        | 1-2y               | 1.5y               | China       | N   |
| Anstice (48)     | 2011 | RCT          | Dual-Focus: 40 | 13.4 ± 0.85 | 24.49 ± 0.72     | -2.67 ± 1.09    | 11:29        | 10m                | 10m                | New Zealand | Y   |

All data shown in mean±SD, if not marked otherwise

N: number of participants; COI: report conflict of interest; RCT: randomized controlled trial; m: month; y: year; NA: not mentioned

SA: spherical aberration

**Table S3C.** Characteristic of included studies of peripheral plus spectacle lenses

| First author     | Year | Study Design | N                       | Age          | Baseline AL (mm) | Baseline SE (D) | Male: Female | Treatment Duration | Cessation Duration | Country   | COI |
|------------------|------|--------------|-------------------------|--------------|------------------|-----------------|--------------|--------------------|--------------------|-----------|-----|
| Lam (49)         | 2023 | RCT          | DIMS-SV (Group2): 14    | 10.21 ± 1.53 | 25.00 ± 0.8      | -2.98 ± 1.13    | 11:3         | 3.5y               | 2.5y               | Hong Kong | Y   |
|                  |      |              | SV-DIMS-SV (Group4): 18 | 10.33 ± 1.71 | 24.42 ± 0.86     | -2.65 ± 1.18    | 9:9          | 1.5y               | 2.5y               |           |     |
| Sankaridrug (50) | 2022 | RCT          | HAL-SV (Group1): 54     | 11.2 ± 1.6   | 25.1 ± 0.8       | -3.47 ± 1.16    | 31:23        | 6m                 | 6m                 | Vietnam   | Y   |

All data shown in mean±SD, if not marked otherwise

N: number of participants; COI: report conflict of interest; RCT: randomized controlled trial; m: month; y: year

DIMS: Defocus Incorporated Multiple Segments

SV: single-vision spectacles

HAL: Highly aspherical lenslets

**Table S4.** Detailed quality assessment of included studies using Cochrane risk of bias 2 tool

| <b>First Author</b>      | <b>Year</b> | <b>Randomization process</b> | <b>Intervention adherence</b> | <b>Missing outcome data</b> | <b>Outcome measurement</b> | <b>Selective reporting</b> | <b>Overall</b> |
|--------------------------|-------------|------------------------------|-------------------------------|-----------------------------|----------------------------|----------------------------|----------------|
| <b>Swarbrick HA (37)</b> | 2014        | L                            | H                             | S                           | L                          | L                          | H              |
| <b>Wei S (40)</b>        | 2017        | L                            | H                             | S                           | L                          | S                          | H              |
| <b>Zhu Q (44)</b>        | 2023        | S                            | H                             | S                           | L                          | S                          | H              |
| <b>Ruiz-Pomeda (46)</b>  | 2021        | S                            | H                             | S                           | L                          | L                          | H              |
| <b>Cheng (47)</b>        | 2016        | S                            | H                             | S                           | L                          | L                          | H              |
| <b>Weng (45)</b>         | 2022        | S                            | H                             | S                           | L                          | L                          | H              |
| <b>Anstice (48)</b>      | 2011        | L                            | H                             | S                           | L                          | L                          | H              |
| <b>Lam (49)</b>          | 2023        | L                            | H                             | S                           | L                          | L                          | H              |
| <b>Sankaridrug (50)</b>  | 2022        | L                            | H                             | S                           | L                          | L                          | H              |

H, high risk of bias; L, low risk of bias; S, some concern of risk of bias.

**Table S5.** Detailed quality assessment of included studies using Cochrane Risk Of Bias In Non-randomised Studies - of Interventions

| <b>First Author</b>               | <b>Year</b> | <b>A1</b> | <b>A2</b> | <b>A3</b> | <b>A4</b> | <b>A5</b> | <b>A6</b> | <b>A7</b> | <b>Overall</b> |
|-----------------------------------|-------------|-----------|-----------|-----------|-----------|-----------|-----------|-----------|----------------|
| <b>Cho P (38)</b>                 | 2016        | Moderate  | Low       | Low       | Moderate  | Low       | Low       | Moderate  | Moderate       |
| <b>Santodomingo-Rubido J (39)</b> | 2016        | Critical  | Serious   | Low       | Moderate  | Low       | Low       | Moderate  | Critical       |
| <b>Li H (41)</b>                  | 2019        | Critical  | Low       | Low       | Moderate  | Low       | Low       | Moderate  | Critical       |
| <b>Li Z (42)</b>                  | 2019        | Moderate  | Low       | Low       | Moderate  | Low       | Low       | Moderate  | Moderate       |
| <b>Wang A (43)</b>                | 2022        | Moderate  | Moderate  | Low       | Moderate  | Low       | Low       | Moderate  | Moderate       |

A1: Bias due to confounding

A2: Bias in selection of participants

A3: Bias in classification of interventions

A4: Bias due to deviations from intended interventions

A5: Bias due to missing data

A6: Bias in measurement of outcomes

A7: Bias in selection of the reported results

## References

1. Santodomingo-Rubido J, Villa-Collar C, Gilmartin B, Gutiérrez-Ortega R. Short-term changes in ocular biometry and refraction after discontinuation of long-term orthokeratology. *Eye Contact Lens*. 2014;40(2):84-90.
2. Lau JK, Wan K, Cheung SW, Vincent SJ, Cho P. Weekly Changes in Axial Length and Choroidal Thickness in Children During and Following Orthokeratology Treatment With Different Compression Factors. *Transl Vis Sci Technol*. 2019;8(4):9.
3. Polse KA, Brand RJ, Schwalbe JS, Vastine DW, Keener RJ. The Berkeley Orthokeratology Study, Part II: Efficacy and duration. *Am J Optom Physiol Opt*. 1983;60(3):187-98.
4. Huang Y, Li X, Ding C, Chen Y, Chen H, Bao J. Orthokeratology reshapes eyes to be less prolate and more symmetric. *Cont Lens Anterior Eye*. 2022;45(4):101532.
5. Polse KA, Brand RJ, Vastine DW, Schwalbe JS. Corneal change accompanying orthokeratology. Plastic or elastic? Results of a randomized controlled clinical trial. *Arch Ophthalmol*. 1983;101(12):1873-8.
6. Wu R, Stapleton F, Swarbrick HA. Residual corneal flattening after discontinuation of long-term orthokeratology lens wear in asian children. *Eye Contact Lens*. 2009;35(6):333-7.
7. Yang L, Guo X, Xie P. Observation of orthokeratology discontinuation. *Zhonghua Yan Ke Za Zhi*. 2015;51(3):178-82.
8. Zhao L, Jing L, Li J, Du X. Changes in corneal densitometry after long-term orthokeratology for myopia and short-term discontinuation. *PLoS One*. 2022;17(2):e0263121.
9. Guo Y, Liu L, Peng L, Fu J, Guo W, Tang P. Effect of overnight orthokeratology lenses on tear film stability in children. *Cont Lens Anterior Eye*. 2023;46(1):101592.
10. Nieto-Bona A, González-Mesa A, Nieto-Bona MP, Villa-Collar C, Lorente-Velázquez A. Long-term changes in corneal morphology induced by overnight orthokeratology. *Curr Eye Res*. 2011;36(10):895-904.
11. Nakamura Y, Hieda O, Yokota I, Teramukai S, Sotozono C, Kinoshita S. Comparison of myopia progression between children wearing three types of orthokeratology lenses and children wearing single-vision spectacles. *Jpn J Ophthalmol*. 2021;65(5):632-43.
12. Lum E, Golebiowski B, Swarbrick HA. Changes in corneal subbasal nerve morphology and sensitivity during orthokeratology: Recovery of change. *Ocul Surf*. 2017;15(2):236-41.
13. Chen Z, Zhou J, Xue F, Zhou X, Qu X. Increased Corneal Toricity after Long-Term Orthokeratology Lens Wear. *J Ophthalmol*. 2018;2018:7106028.
14. Wan K, Lau JK, Cheung SW, Cho P. Refractive and corneal responses of young myopic children to short-term orthokeratology treatment with different compression factors. *Cont Lens Anterior Eye*. 2020;43(1):65-72.

15. Wan K, Yau HT, Cheung SW, Cho P. Corneal thickness changes in myopic children during and after short-term orthokeratology lens wear. *Ophthalmic Physiol Opt.* 2021;41(4):757-67.
16. Kang P, Swarbrick H. Discontinuation of long term orthokeratology lens wear and subsequent refractive surgery outcome. *Cont Lens Anterior Eye.* 2017;40(6):436-9.
17. Gispets J, Yébana P, Lupón N, Cardona G, Pérez-Corral J, Pauné J, et al. Efficacy, predictability and safety of long-term orthokeratology: An 18-year follow-up study. *Cont Lens Anterior Eye.* 2022;45(1):101530.
18. Cho P, Cheung SW. Retardation of myopia in Orthokeratology (ROMIO) study: a 2-year randomized clinical trial. *Invest Ophthalmol Vis Sci.* 2012;53(11):7077-85.
19. Soni PS, Nguyen TT, Bonanno JA. Overnight orthokeratology: refractive and corneal recovery after discontinuation of reverse-geometry lenses. *Eye Contact Lens.* 2004;30(4):254-62; discussion 63-4.
20. Kobayashi Y, Yanai R, Chikamoto N, Chikama T, Ueda K, Nishida T. Reversibility of effects of orthokeratology on visual acuity, refractive error, corneal topography, and contrast sensitivity. *Eye Contact Lens.* 2008;34(4):224-8.
21. Hiraoka T, Okamoto C, Ishii Y, Okamoto F, Oshika T. Recovery of corneal irregular astigmatism, ocular higher-order aberrations, and contrast sensitivity after discontinuation of overnight orthokeratology. *Br J Ophthalmol.* 2009;93(2):203-8.
22. Xing XH, Wang XY, Wang SH, Tu J. Influence of the duration of orthokeratology lens cessation on patients' refractive status and corneal endothelial cells. *Int Eye Sci.* 2023;23(4).
23. Dong J, Liu ZY, Feng YL. The comparative study of orthokeratology lens and frame glasses in adolescent myopia. *Chinese Journal of Strabismus & Pediatric Ophthalmology.* 2013;21(1).
24. Jin YM, Zhang Y, Li H, Hu BY. Effects of Orthokeratology Lens on Corneal Endothelium and Corneal Thickness. *Med J PUMCH.* 2011;2(2).
25. Mai ZC, Lin ZX. Study on the Changes of Refraction and Corneal Shape after Stop Wearing Orthokeratology. *Mod Diagn Treat.* 2016;27(13).
26. Zhou ZX, Xu SS, Yi SP. Clinical effect of orthokeratology for juvenile with myopia astigmatism and its effects on corneal endothelial cells. *Int Eye Sci.* 2016;16(8).
27. Yang L, Guo X, Xie P. Observation of orthokeratology discontinuation. *Chin J Ophthalmol.* 2015;0(3).
28. Lu WW, Lian Y, X.L. Y, W.Q. J. Changes and Relationship Analysis of Ocular Parameters After Short-term Discontinuation of Orthokeratology. *Journal of Sun Yat-sen University (Medical Sciences).* 2019;40(5).
29. Hu J, Geng L, Yang QH, Wang LQ, Huang YF. Analysis of corneal morphology after one-month discontinuation of orthokeratology treatment. *Acad J Chin PLA Med Sch.* 2019;40(9).

30. Sibug ME, Datiles MB, 3rd, Kashima K, McCain L, Kracher G. Specular microscopy studies on the corneal endothelium after cessation of contact lens wear. *Cornea*. 1991;10(5):395-401.
31. Lei Y, Zheng X, Hou J, Xu B, Mu G. Effects of long-term soft contact lens wear on the corneal thickness and corneal epithelial thickness of myopic subjects. *Mol Med Rep*. 2015;11(3):2020-6.
32. Sankaridurg P. Contact lenses to slow progression of myopia. *Clin Exp Optom*. 2017;100(5):432-7.
33. Zhu Q, Liu Y, Tighe S, Zhu Y, Su X, Lu F, et al. Retardation of Myopia Progression by Multifocal Soft Contact Lenses. *Int J Med Sci*. 2019;16(2):198-202.
34. Morgan PB, Sulley AL. Challenges to the new soft contact lens wearer and strategies for clinical management. *Cont Lens Anterior Eye*. 2023;46(3):101827.
35. Ruiz-Pomeda A, Pérez-Sánchez B, Prieto-Garrido FL, Gutiérrez-Ortega R, Villa-Collar C. MiSight Assessment Study Spain: Adverse Events, Tear Film Osmolarity, and Discontinuations. *Eye Contact Lens*. 2018;44 Suppl 2:S180-s6.
36. Berntsen DA, Mutti DO, Zadnik K. Study of Theories about Myopia Progression (STAMP) design and baseline data. *Optom Vis Sci*. 2010;87(11):823-32.
37. Swarbrick HA, Alharbi A, Watt K, Lum E, Kang P. Myopia control during orthokeratology lens wear in children using a novel study design. *Ophthalmology*. 2015;122(3):620-30.
38. Cho P, Cheung SW. Discontinuation of orthokeratology on eyeball elongation (DOEE). *Cont Lens Anterior Eye*. 2017;40(2):82-7.
39. Santodomingo-Rubido J, Villa-Collar C, Gilmartin B, Gutiérrez-Ortega R, Sugimoto K. Long-term Efficacy of Orthokeratology Contact Lens Wear in Controlling the Progression of Childhood Myopia. *Curr Eye Res*. 2017;42(5):713-20.
40. Wei S, Li SM, An W, Du J, Liang X, Sun Y, et al. Myopia progression after cessation of low-dose atropine eyedrops treatment: A two-year randomized, double-masked, placebo-controlled, cross-over trial. *Acta Ophthalmol*. 2023;101(2):e177-e84.
41. Li H, Ouyang J. The effect of long-term wearing of keratoplasty lenses and stopping wearing on corneal thickness. *Proceeding of Clinical Medicine*. 2019;28(7):496-9.
42. Li Z, Hu Y, Cui D, Long W, He M, Yang X. Change in subfoveal choroidal thickness secondary to orthokeratology and its cessation: a predictor for the change in axial length. *Acta Ophthalmol*. 2019;97(3):e454-e9.
43. Wang A, Yang C, Shen L, Wang J, Zhang Z, Yang W. Axial length shortening after orthokeratology and its relationship with myopic control. *BMC Ophthalmol*. 2022;22(1):243.
44. Zhu Q, Yin J, Li X, Hu M, Xue L, Zhang J, et al. Effects of Long-Term Wear and Discontinuation of Orthokeratology Lenses on the Eyeball Parameters in Children with Myopia. *Int J Med Sci*. 2023;20(1):50-6.



45. Weng R, Lan W, Bakaraju R, Conrad F, Naduvilath T, Yang ZK, et al. Efficacy of contact lenses for myopia control: Insights from a randomised, contralateral study design. *Ophthalmic Physiol Opt.* 2022;42(6):1253-63.
46. Ruiz-Pomeda A, Prieto-Garrido FL, Hernández Verdejo JL, Villa-Collar C. Rebound Effect in the Misight Assessment Study Spain (Mass). *Curr Eye Res.* 2021;46(8):1223-6.
47. Cheng X, Xu J, Chehab K, Exford J, Brennan N. Soft Contact Lenses with Positive Spherical Aberration for Myopia Control. *Optom Vis Sci.* 2016;93(4):353-66.
48. Anstice NS, Phillips JR. Effect of dual-focus soft contact lens wear on axial myopia progression in children. *Ophthalmology.* 2011;118(6):1152-61.
49. Lam CSY, Tang WC, Zhang HY, Lee PH, Tse DYY, Qi H, et al. Long-term myopia control effect and safety in children wearing DIMS spectacle lenses for 6 years. *Sci Rep.* 2023;13(1):5475.
50. Sankaridurg P, Weng R, Tran H, Spiegel DP, Drobe B, Ha T, et al. Spectacle Lenses With Highly Aspherical Lenslets for Slowing Myopia: A Randomized, Double-Blind, Cross-Over Clinical Trial: Parts of these data were presented as a poster at the Annual Research in Vision and Ophthalmology meeting, 2022. *Am J Ophthalmol.* 2023;247:18-24.
